# Supplementary material
Source: HighWire-hosted journal article supplement (https://jpet.aspetjournals.org/highwire/filestream/146154/field_highwire_adjunct_files/0/258640SupplFigures.pdf)
Supplement: 258640SupplFigures.pdf [file 258640SupplFigures.pdf]

**Supplemental Material**

**A novel G protein-biased agonist at the  $\delta$  opioid receptor with analgesic efficacy in models of  
chronic pain**

Alexandra E Conibear, Junaid Asghar, Rob Hill, Graeme Henderson, Eva Borbely, Valeria Tekus,  
Zsuzsanna Helyes, Jo Palandri, Chris Bailey, Ingemar Starke, Bengt von Mentzer, David Kendall,  
Eamonn Kelly.

*The Journal of Pharmacology and Experimental Therapeutics*

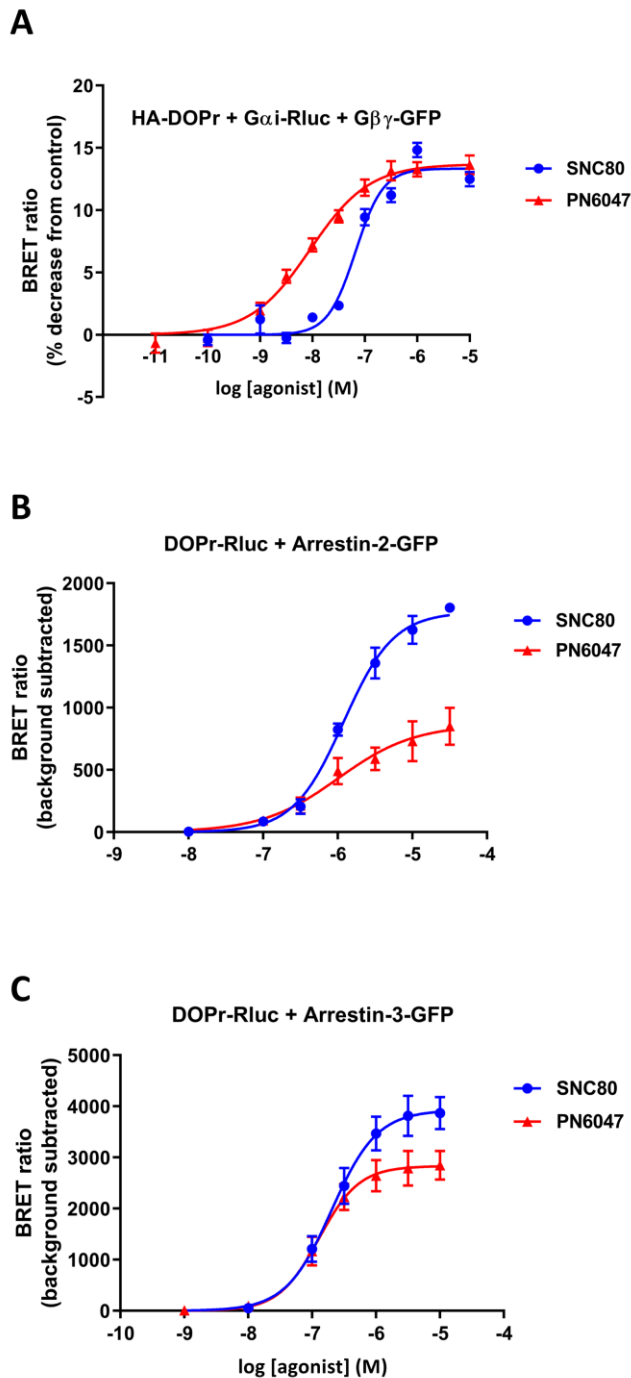

**Supplemental figure 1.** Comparison of SNC80 and PN6047 *in vitro* signalling profiles. Here data from figure 1 are presented showing only results for SNC80 and PN6047 to highlight the G protein bias profile of PN6047. Note the position of the PN6047 curve relative to the SNC80 curve for G protein activation v arrestin recruitment.

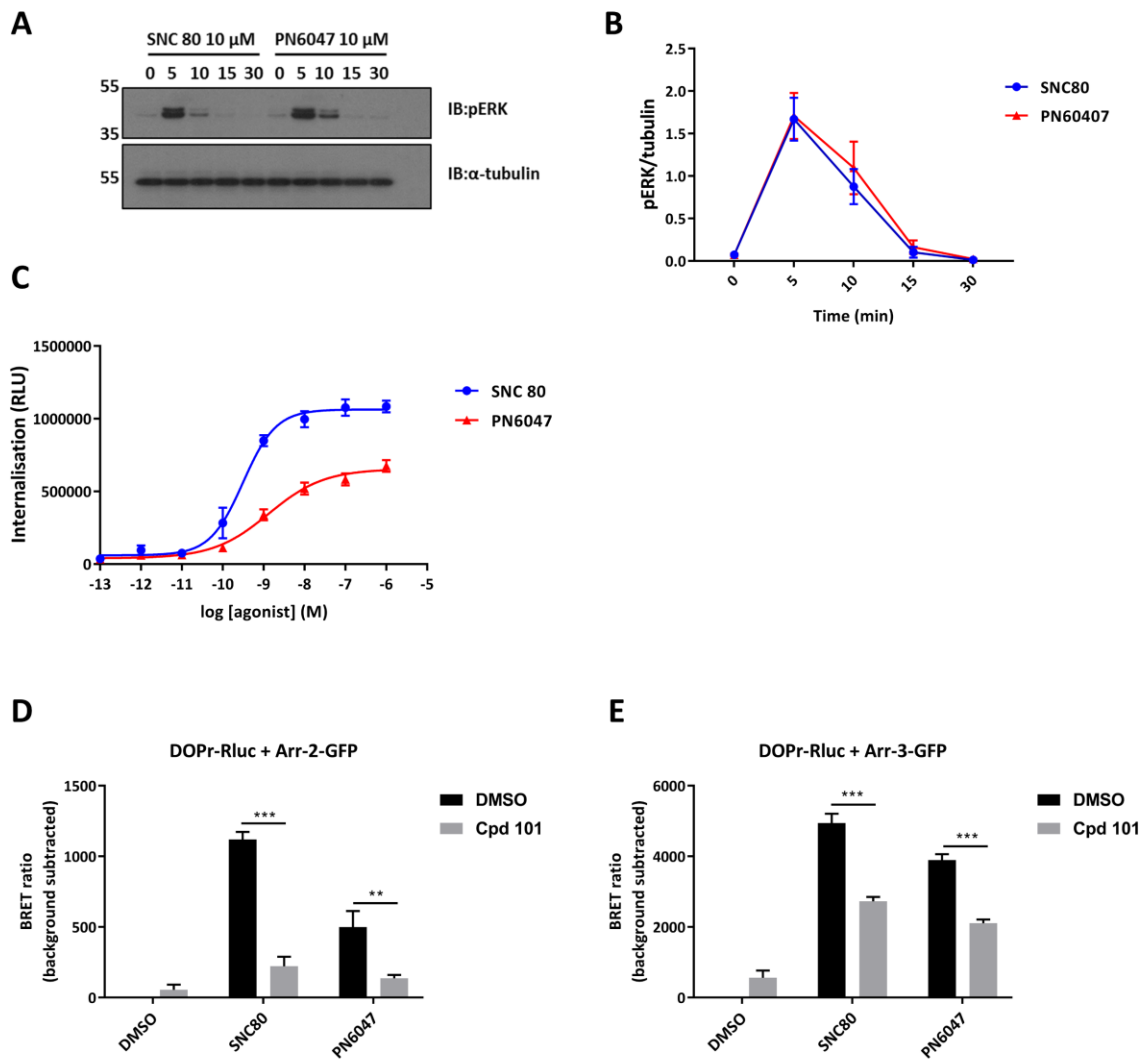

**Supplemental figure 2.** PN6047 is a full agonist for ERK activation but a partial agonist for internalisation. A and B) Western blot analysis of phospho-ERK signalling induced by 10  $\mu$ M SNC80 or PN6047 (0-30 min) in HEK-DOR cells. A) Example Western blot B) densitometric analysis of 5 independent experiments. Data represent mean  $\pm$  SEM and were analysed by two-way ANOVA with Bonferroni's *post-hoc* test. C) Concentration-dependent internalisation of  $\delta$  receptor in U2OS-OPRD1 cells in response of SNC80 and PN6047. Internalisation was assessed using the PathHunter™ (DiscoverX) assay, data represent mean  $\pm$  SEM ( $n=6-8$ ). D and E) Agonist-induced arrestin recruitment is reduced by preincubation of cells with compound 101 (100  $\mu$ M; 30 min), the GRK

inhibitor. Arrestin-2 (D) and arrestin-3 (E) recruitment was assessed using BRET technology in HEK 293 cells transiently expressing DOR-Rluc and either arrestin-2-GFP or Arrestin-3-GFP. Cells were stimulated with either SNC80 or PN6047 (10  $\mu$ M; 10 min). Data represent mean  $\pm$  SEM ( $n=3$ ) and were analysed by two-way ANOVA followed by Bonferroni's *post-hoc* test (\*\* $P<0.01$  and \*\*\* $P<0.0001$ ).

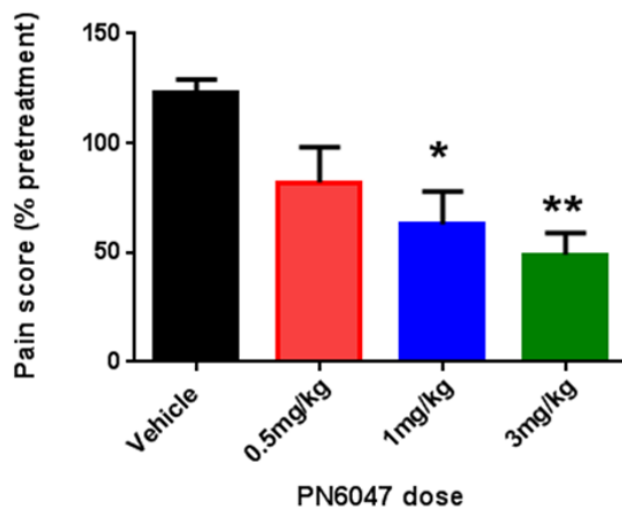

**Supplemental figure 3.** Dose-dependent anti-hyperalgesic action of PN6047 in the rat SNL model of neuropathic pain. Dose response of PN6047 (0.5, 1, 3 mg/kg; p.o.) induced mechanical anti-hyperalgesia in male Wistar rats (weight 237-310 g) determined 60 min post drug administration, 7 days post-surgery. Data represent mean  $\pm$  SEM ( $n=6-7$  rats per dose) and were analysed by one-way ANOVA with Bonferroni's *post-hoc* test (\* $P<0.05$ ; \*\* $P<0.01$ ).

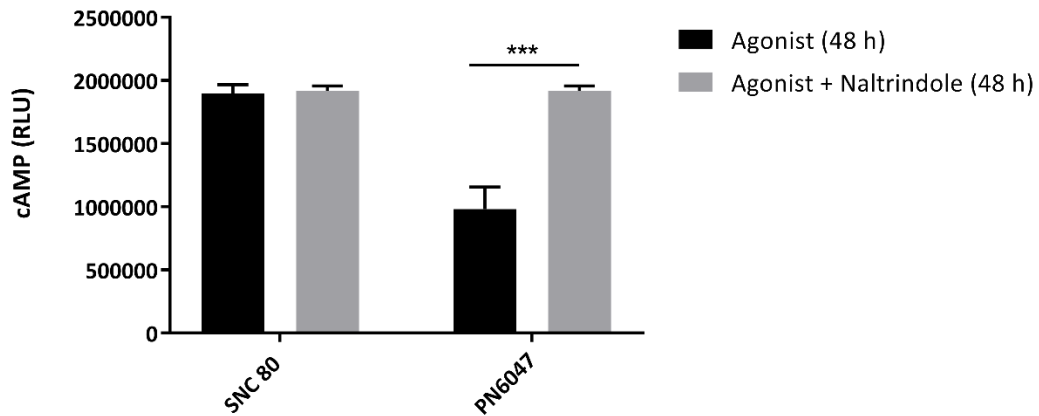

**Supplemental figure 4.** PN6047 has no effect in an *in vitro* model of desensitisation when administered to cells for 48 hours. Agonist-induced desensitization of cAMP inhibition in CHO-K1-hDOR cells, cAMP formation was measured using the HitHunter™ (DiscoverX) assay kit. Cells were pre-treated with 1  $\mu$ M SNC80 or PN6047 for 48 hrs at 37°C. After a 30 min washout period, cells were stimulated with forskolin (1  $\mu$ M) and re-challenged with either 1  $\mu$ M SNC80 or PN6047  $\pm$  naltrindole (1  $\mu$ M) for 30 min. Data shown are the means  $\pm$  SEM ( $n=3$ ). Data were analysed by one-way ANOVA with Sidak's multiple comparison test between selected pairs (\*\*\*) ( $P < 0.0001$ ).

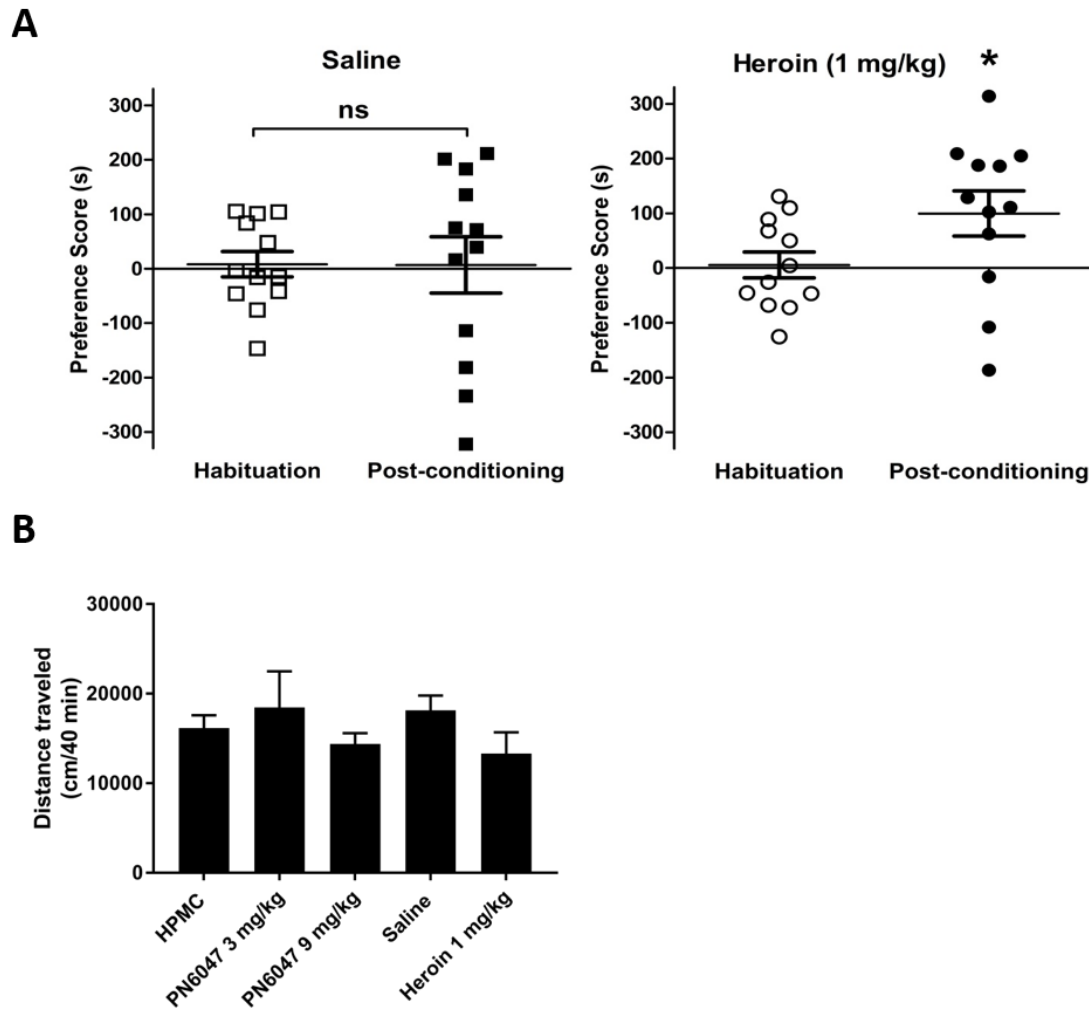

**Supplemental figure 5.** Opioid-induced conditioned place preference and locomotion. A) Heroin-induced conditioned place preference. Preference scores for male Wistar rats conditioned with saline (s.c.) or 1 mg/kg heroin (s.c.). Data points are individual rat responses with mean  $\pm$  SEM overlaid. ( $n=12$  rats/group) and were analysed by Student's t-test for paired comparison between post-conditioning vs habituation scores ( $*P<0.05$ ). B) Locomotor activity of vehicle (HPMC ( $n=48$ ; *i.p.*) or saline ( $n=36$ ; *s.c.*)), PN6047 (3 mg/kg ( $n=12$ ) or 9 mg/kg ( $n=12$ ); *i.p.*) or heroin (1 mg/kg; *s.c.*) treated rats. Locomotor activity is given as distance travelled in cm over a 40 min test period, during the first two days of conditioning sessions. Data represent mean  $\pm$  SEM and were analysed by one-way ANOVA with Bonferroni's *post-hoc* test.
